# Supplementary material for: Effects of Antioxidant Supplementation on Metabolic Disorders in Obese Patients from Randomized Clinical Controls: A Meta-Analysis and Systematic Review
Source: PubMed Central journal article supplement (PMC9459443; doi:10.1155/2022/7255413), 2022-09-01
Supplement: 7255413.f2.pdf [file 7255413.f2.pdf]

# Supplemental Figure S1

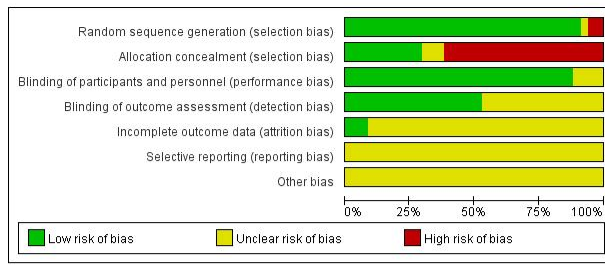

|                                     | Random sequence generation (selection bias) | Allocation concealment (selection bias) | Blinding of participants and personnel (performance bias) | Blinding of outcome assessment (detection bias) | Incomplete outcome data (attrition bias) | Selective reporting (reporting bias) | Other bias |
|-------------------------------------|---------------------------------------------|-----------------------------------------|-----------------------------------------------------------|-------------------------------------------------|------------------------------------------|--------------------------------------|------------|
| Baldrick, F. R 2018                 | +                                           | +                                       | +                                                         | ?                                               | -                                        | ?                                    | ?          |
| Bogdanski, P 2012                   | -                                           | +                                       | +                                                         | ?                                               | ?                                        | ?                                    | ?          |
| Cavedon, E., J 2020                 | -                                           | -                                       | +                                                         | +                                               | +                                        | ?                                    | ?          |
| Dashtabi, A 2016                    | +                                           | +                                       | +                                                         | +                                               | +                                        | ?                                    | ?          |
| de Souza, R. G. M 2018              | +                                           | +                                       | +                                                         | +                                               | ?                                        | ?                                    | ?          |
| de Souza, R. G. M 2019              | +                                           | +                                       | +                                                         | ?                                               | ?                                        | ?                                    | ?          |
| Eisner, A 2020                      | +                                           | -                                       | +                                                         | +                                               | ?                                        | ?                                    | ?          |
| Fathi, M 2020                       | +                                           | +                                       | +                                                         | ?                                               | ?                                        | ?                                    | ?          |
| Hosseinpour-Arjmand, S 2019         | +                                           | -                                       | +                                                         | ?                                               | ?                                        | ?                                    | ?          |
| Jasbi, P 2019                       | +                                           | -                                       | +                                                         | ?                                               | ?                                        | ?                                    | ?          |
| Kamali, S. H 2012                   | +                                           | -                                       | +                                                         | ?                                               | ?                                        | ?                                    | ?          |
| Kazemipour, M 2013                  | +                                           | -                                       | ?                                                         | ?                                               | ?                                        | ?                                    | ?          |
| Khorsandi, H 2019                   | +                                           | -                                       | ?                                                         | ?                                               | ?                                        | ?                                    | ?          |
| Kirch, N 2018                       | +                                           | +                                       | +                                                         | ?                                               | ?                                        | ?                                    | ?          |
| Kojadinovic, M 2021                 | +                                           | ?                                       | ?                                                         | ?                                               | ?                                        | ?                                    | ?          |
| Li, Y 2010                          | +                                           | -                                       | ?                                                         | ?                                               | ?                                        | ?                                    | ?          |
| Luciana Nicolau Aranha 2020         | +                                           | -                                       | +                                                         | +                                               | ?                                        | ?                                    | ?          |
| Maria Angelica Arzola-Paniagua 2016 | +                                           | ?                                       | +                                                         | ?                                               | ?                                        | ?                                    | ?          |
| Marreiro, D. D 2006                 | +                                           | -                                       | +                                                         | +                                               | ?                                        | ?                                    | ?          |
| Mohammad Alizadeh 2018              | +                                           | +                                       | +                                                         | +                                               | ?                                        | ?                                    | ?          |
| Most, J 2018                        | +                                           | +                                       | +                                                         | +                                               | ?                                        | ?                                    | ?          |
| Nishimura, M 2019                   | +                                           | -                                       | +                                                         | ?                                               | ?                                        | ?                                    | ?          |
| Pawel Bogdanski 2012                | +                                           | -                                       | +                                                         | +                                               | ?                                        | ?                                    | ?          |
| Payahoo, L 2014                     | +                                           | -                                       | +                                                         | ?                                               | ?                                        | ?                                    | ?          |
| Polus, A 2016                       | ?                                           | ?                                       | +                                                         | +                                               | ?                                        | ?                                    | ?          |
| Roberts, J. D 2021                  | +                                           | -                                       | +                                                         | +                                               | ?                                        | ?                                    | ?          |
| Santamarina, A.B 2020               | +                                           | -                                       | +                                                         | +                                               | ?                                        | ?                                    | ?          |
| Stull, A. J 2010                    | +                                           | -                                       | +                                                         | +                                               | ?                                        | ?                                    | ?          |
| Suliburska, J 2014                  | +                                           | -                                       | +                                                         | +                                               | ?                                        | ?                                    | ?          |
| Szewczyk-Golec, K 2017              | +                                           | +                                       | +                                                         | +                                               | ?                                        | ?                                    | ?          |
| Szulinska, M 2017                   | +                                           | -                                       | +                                                         | +                                               | ?                                        | ?                                    | ?          |
| Szulinska, M 2018                   | +                                           | -                                       | +                                                         | +                                               | ?                                        | ?                                    | ?          |
| Taghizadeh, M 2017                  | +                                           | -                                       | +                                                         | +                                               | ?                                        | ?                                    | ?          |
| Williams, E. J 2017                 | +                                           | -                                       | +                                                         | ?                                               | ?                                        | ?                                    | ?          |

# Supplemental Figure S2

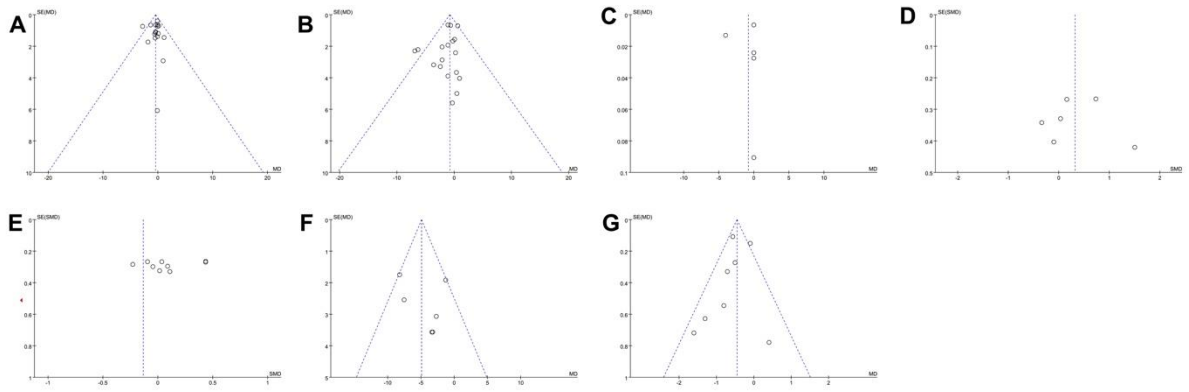

Supplemental Figure S3

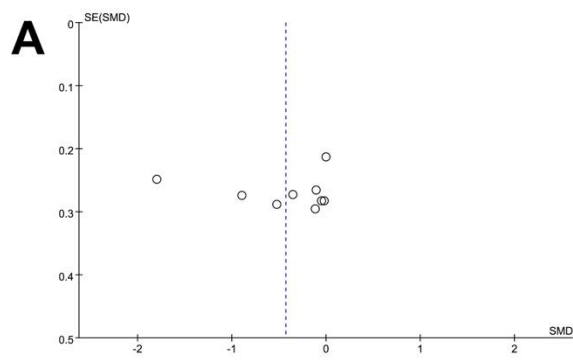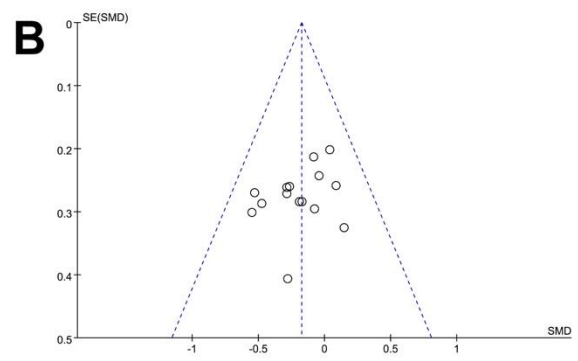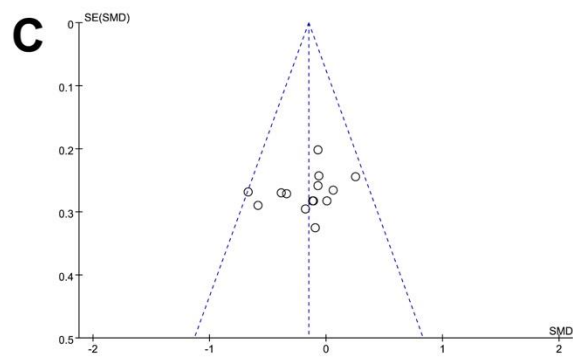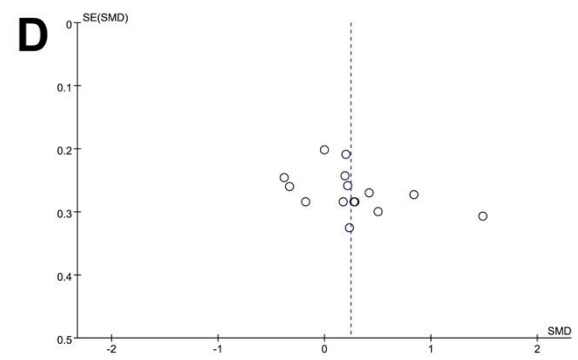

Supplemental Figure S4

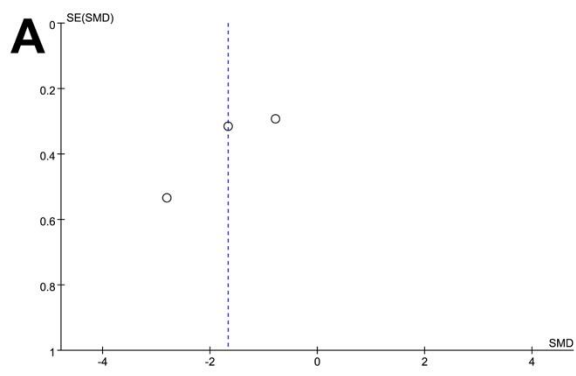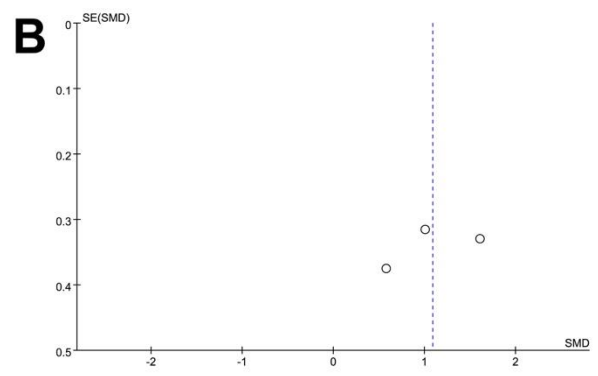

# Supplemental Figure S5

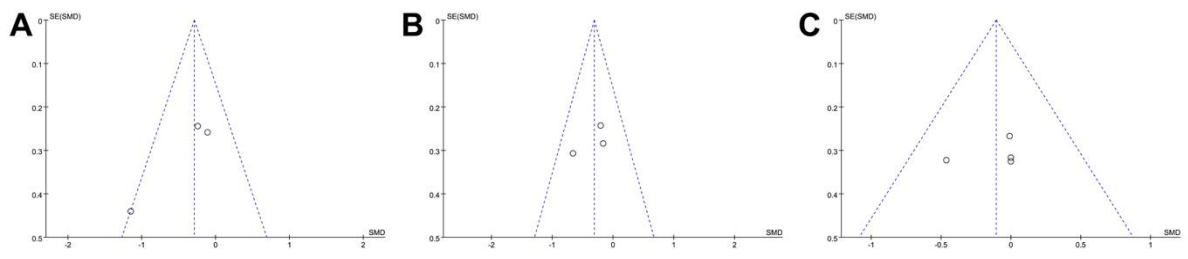

Supplemental Figure S6

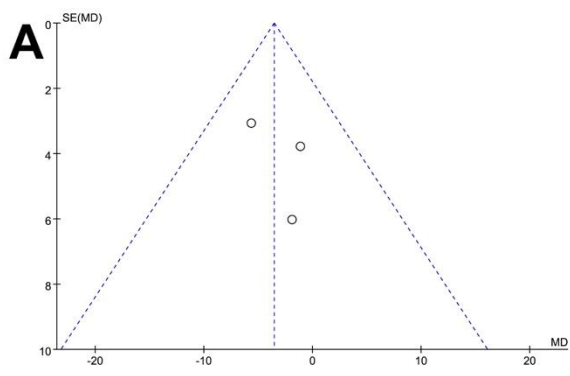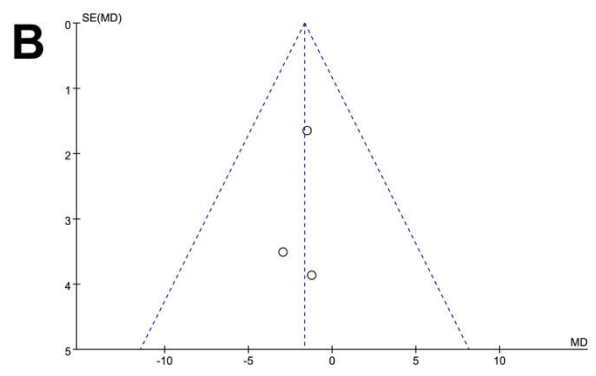

Supplementary Table S1 Subgroup analysis of the effects of antioxidants on BMI, WC, WHR, Leptin, FM, FBG and HOMA-ir in obesity patients and compared with controls

| Subgroup                   | BMI (kg/m <sup>2</sup> )                    | WC (cm)                                      | WHR (mmol/L)                                | Leptin (µg/L)                               | FM (kg)                                     | FBG (µg/dL)                                    | HOMA-ir                                        |
|----------------------------|---------------------------------------------|----------------------------------------------|---------------------------------------------|---------------------------------------------|---------------------------------------------|------------------------------------------------|------------------------------------------------|
| Water-soluble antioxidants | MD=-0.37<br>95% CI=(-0.83, 0.09),<br>P=0.12 | MD=-1.00<br>95% CI=(-3.58, -1.59)<br>P=0.003 | MD=-1.51<br>95% CI=(-0.63, -0.03)<br>P=0.45 | SMD=0.16<br>95% CI=(-0.32, -0.63)<br>P=0.51 | MD=-0.78<br>95% CI=(-2.36, 0.80)<br>P=0.34  | SMD=-5.07<br>95% CI=(-7.09,-3.05)<br>P<0.00001 | MD=-0.46<br>95% CI=(-0.62, -0.31)<br>P<0.00001 |
| Fat-soluble antioxidants   | MD=-0.15<br>95% CI=(-0.97,-0.68)<br>P=0.72  | MD=0.37<br>95% CI=(-0.89, -1.63)<br>P=0.57   | -                                           | MD=0.74<br>95% CI=(-0.69, 2.18)<br>P=0.03   | MD=0.03<br>95% CI=(-0.41, 0.46)<br>P=0.91   | MD=-3.20<br>95% CI=(-10.19, 3.79)<br>P=0.37    | -                                              |
| Mixed antioxidants         | MD=-1.12<br>95% CI=(-2.27,-0.03)<br>P=0.06  | MD=-0.79<br>95% CI=(-2.04, -0.45)<br>P=0.21  | MD=0.01<br>95% CI=(-0.00, 0.02)<br>P=0.13   | -                                           | SMD=0.05<br>95% CI=(-0.20, -0.30)<br>P=0.67 | -                                              | MD=0.40<br>95% CI=(-1.13, 1.93)<br>P=0.61      |

Supplementary Table S2 Subgroup analysis of the effects of antioxidants on TC, TG, LDL and HDL in obesity patients and compared with controls group

| Subgroup                   | TC (µg/dL)                                 | TG (µg/dL)                                 | LDL (µg/dL)                                | HDL (µg/dL)                                |
|----------------------------|--------------------------------------------|--------------------------------------------|--------------------------------------------|--------------------------------------------|
| Water-soluble antioxidants | SMD=-0.16<br>95%CI=(-0.39, 0.07)<br>P=0.16 | SMD=-0.11<br>95%CI=(-0.26, 0.05)<br>P=0.17 | SMD=-0.13<br>95%CI=(-0.29, 0.04)<br>P=0.13 | SMD=0.17<br>95%CI=(-0.13, -0.47)<br>P=0.26 |
| Fat-soluble antioxidants   | SMD=-0.11<br>95%CI=(-0.63, 0.41)<br>P=0.69 | SMD=-0.53<br>95%CI=(-1.05, 0.00)<br>P=0.05 | MD=0.06<br>95%CI=(-0.46, 0.58)<br>P=0.82   | -                                          |
| Mixed antioxidants         | SMD=-0.94<br>95%CI=(-1.89, 0.01)<br>P=0.05 | SMD=-0.19<br>95%CI=(-0.48, 0.09)<br>P=0.18 | SMD=-0.28<br>95%CI=(-0.57, 0.00)<br>P=0.05 | SMD=0.39<br>95%CI=(0.16, 0.63)<br>P=0.001  |



Supplementary Table S3 Subgroup analysis of the effects of antioxidants on MDA and SOD in obesity patients and compared with controls group

| Subgroup                   | MDA (mmol/L)                                   | SOD (mmol/L)                                |
|----------------------------|------------------------------------------------|---------------------------------------------|
| Water-soluble antioxidants | MD=-1.21<br>95% CI=(-2.08, -0.34)<br>P=0.007   | MD=1.61<br>95% CI=(0.96, 2.25)<br>P<0.00001 |
| Fat-soluble antioxidants   | MD=-2.80<br>95% CI=(-3.84, -1.76)<br>P<0.00001 | MD=0.58,<br>95% CI=(-0.15, 1.32)<br>P=0.12  |
| Mixed antioxidants         | -                                              | MD=1.01<br>95% CI=(0.39, 1.63)<br>P=0.001   |

Supplementary Table S4 Subgroup analysis of the effects of antioxidants on TNF- $\alpha$ , IL-6 and CRP in obesity patients and compared with controls group

| Subgroup                   | TNF- $\alpha$ (pg/mL)                       | IL-6 (pg/mL)                                  | CRP (mg/L)                                 |
|----------------------------|---------------------------------------------|-----------------------------------------------|--------------------------------------------|
| Water-soluble antioxidants | MD=-0.29<br>95% CI=(-0.56, -0.02)<br>P=0.03 | MD=-0.19<br>95% CI=(-0.55, 0.18)<br>P=0.31    | MD=-0.19<br>95% CI=(-0.60, 0.21)<br>P=0.35 |
| Fat-soluble antioxidants   | -                                           | SMD=-0.66,<br>95% CI=(-1.26, -0.06)<br>P=0.03 | MD=0.00,<br>95% CI=(-0.62, 0.62)<br>P=1.00 |
| Mixed antioxidants         | -                                           | -                                             | MD=0.00<br>95% CI=(-0.64, 0.64)<br>P=1.00  |

Supplementary Table S5 Subgroup analysis of the effects of antioxidants on ALT and AST in obesity patients and compared with controls group

| Subgroup                   | ALT (U/L)                                   | AST (U/L)                                   |
|----------------------------|---------------------------------------------|---------------------------------------------|
| Water-soluble antioxidants | MD=-1.31<br>95% CI=(-4.11, 1.49)<br>P=0.36  | MD=-0.32<br>95% CI=(-2.13, 1.48)<br>P=0.73  |
| Fat-soluble antioxidants   | MD=-1.90<br>95% CI=(-13.70, 9.90)<br>P=0.75 | MD=-2.90<br>95% CI=(-9.77, -3.97)<br>P=0.41 |
| Mixed antioxidants         | -                                           | MD=-1.20<br>95% CI=(-8.78, 6.38)<br>P=0.76  |
